# Supplementary material
Source: publisher site journal article supplement (https://www.dovepress.com/get_supplementary_file.php?f=331734.docx)

**SUPPLEMENTARY MATERIALS**

**Manuscript title:**

Lung health in the Solomon Islands: A mixed methods study

**Authors:**

James Di Michiel, Julie Gawthorne, Aruna Shivam, Kevin Maruno, Sarah Cohn, Christopher Lemon, Zhixin Liu, Anthony Byrne

**Appendix 1 - Questionnaire**

(S1) - St Vincent’s Respiratory Questionnaire (SVRQ)


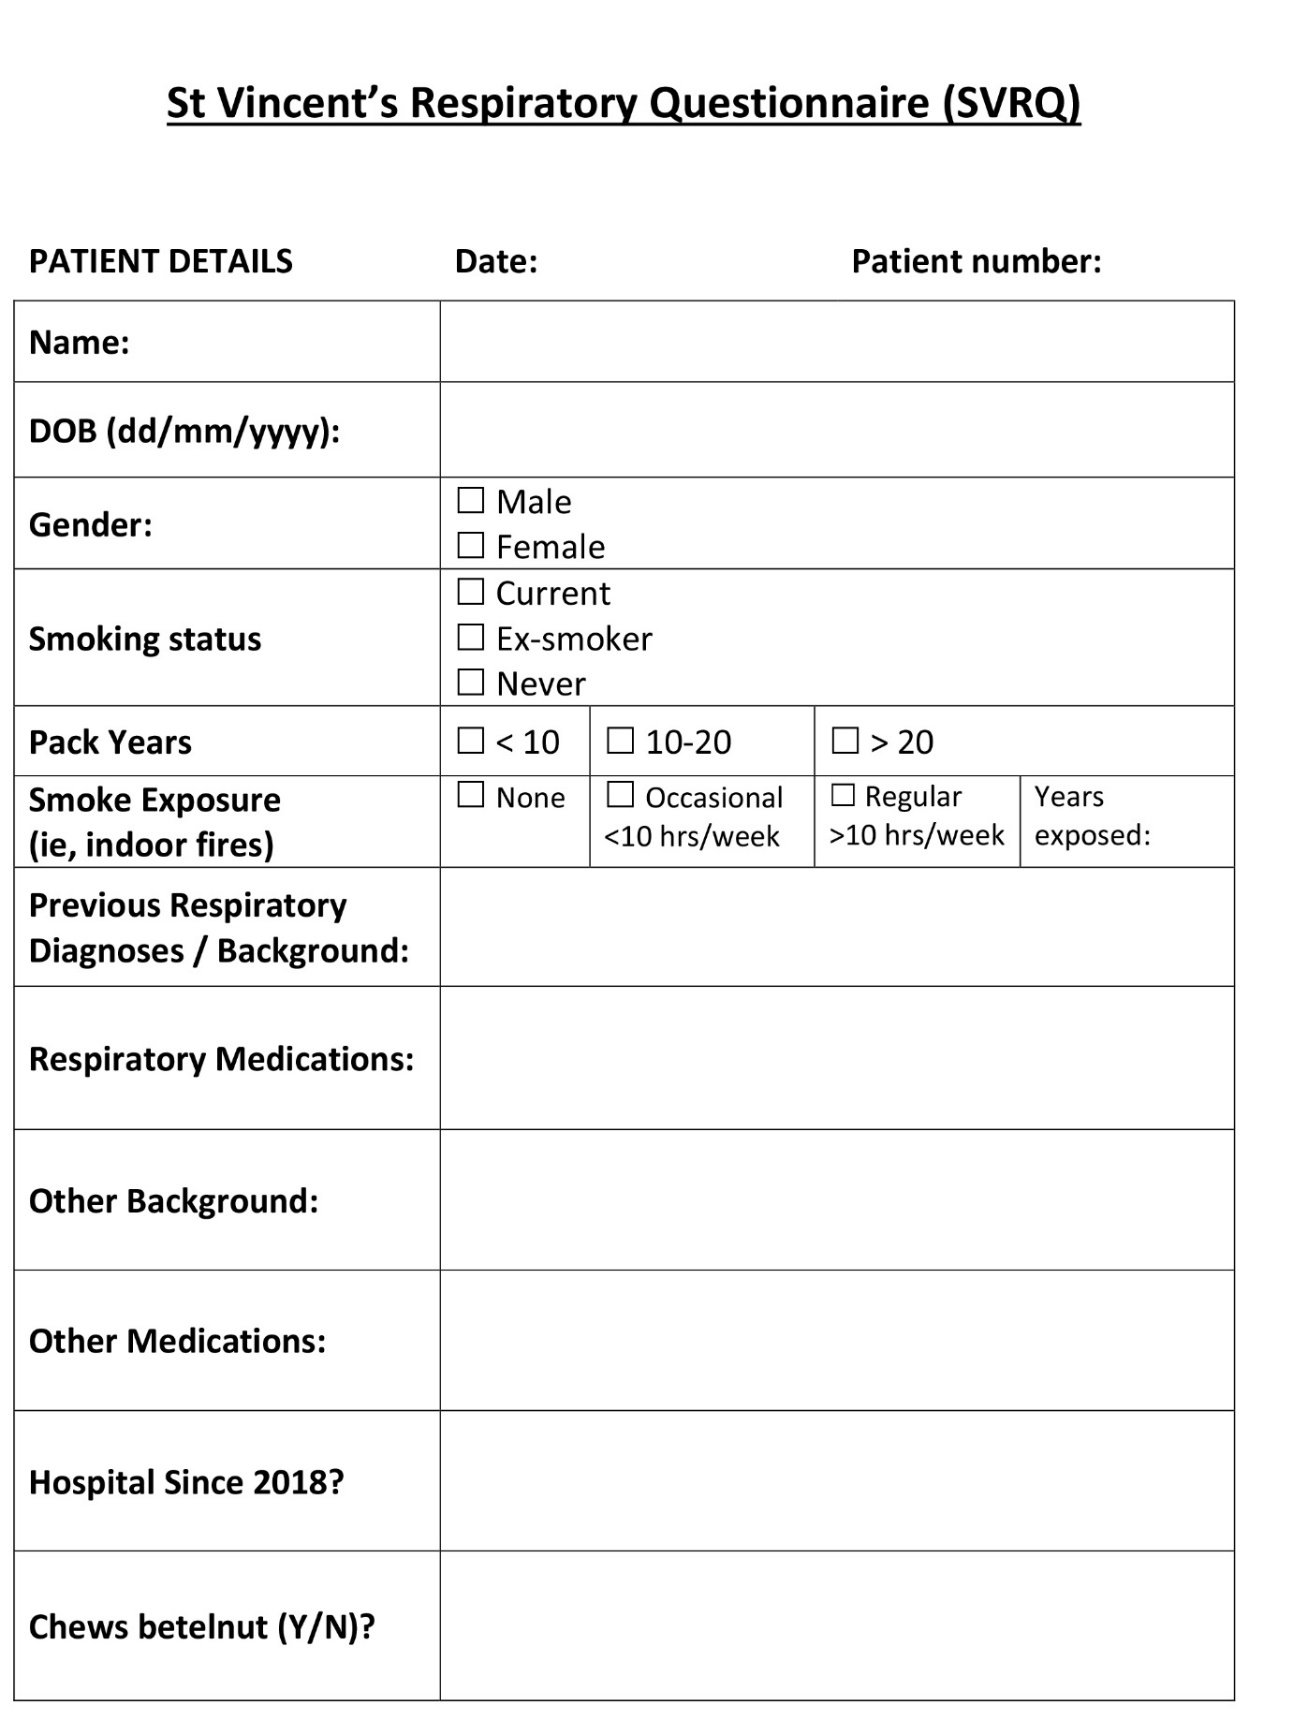


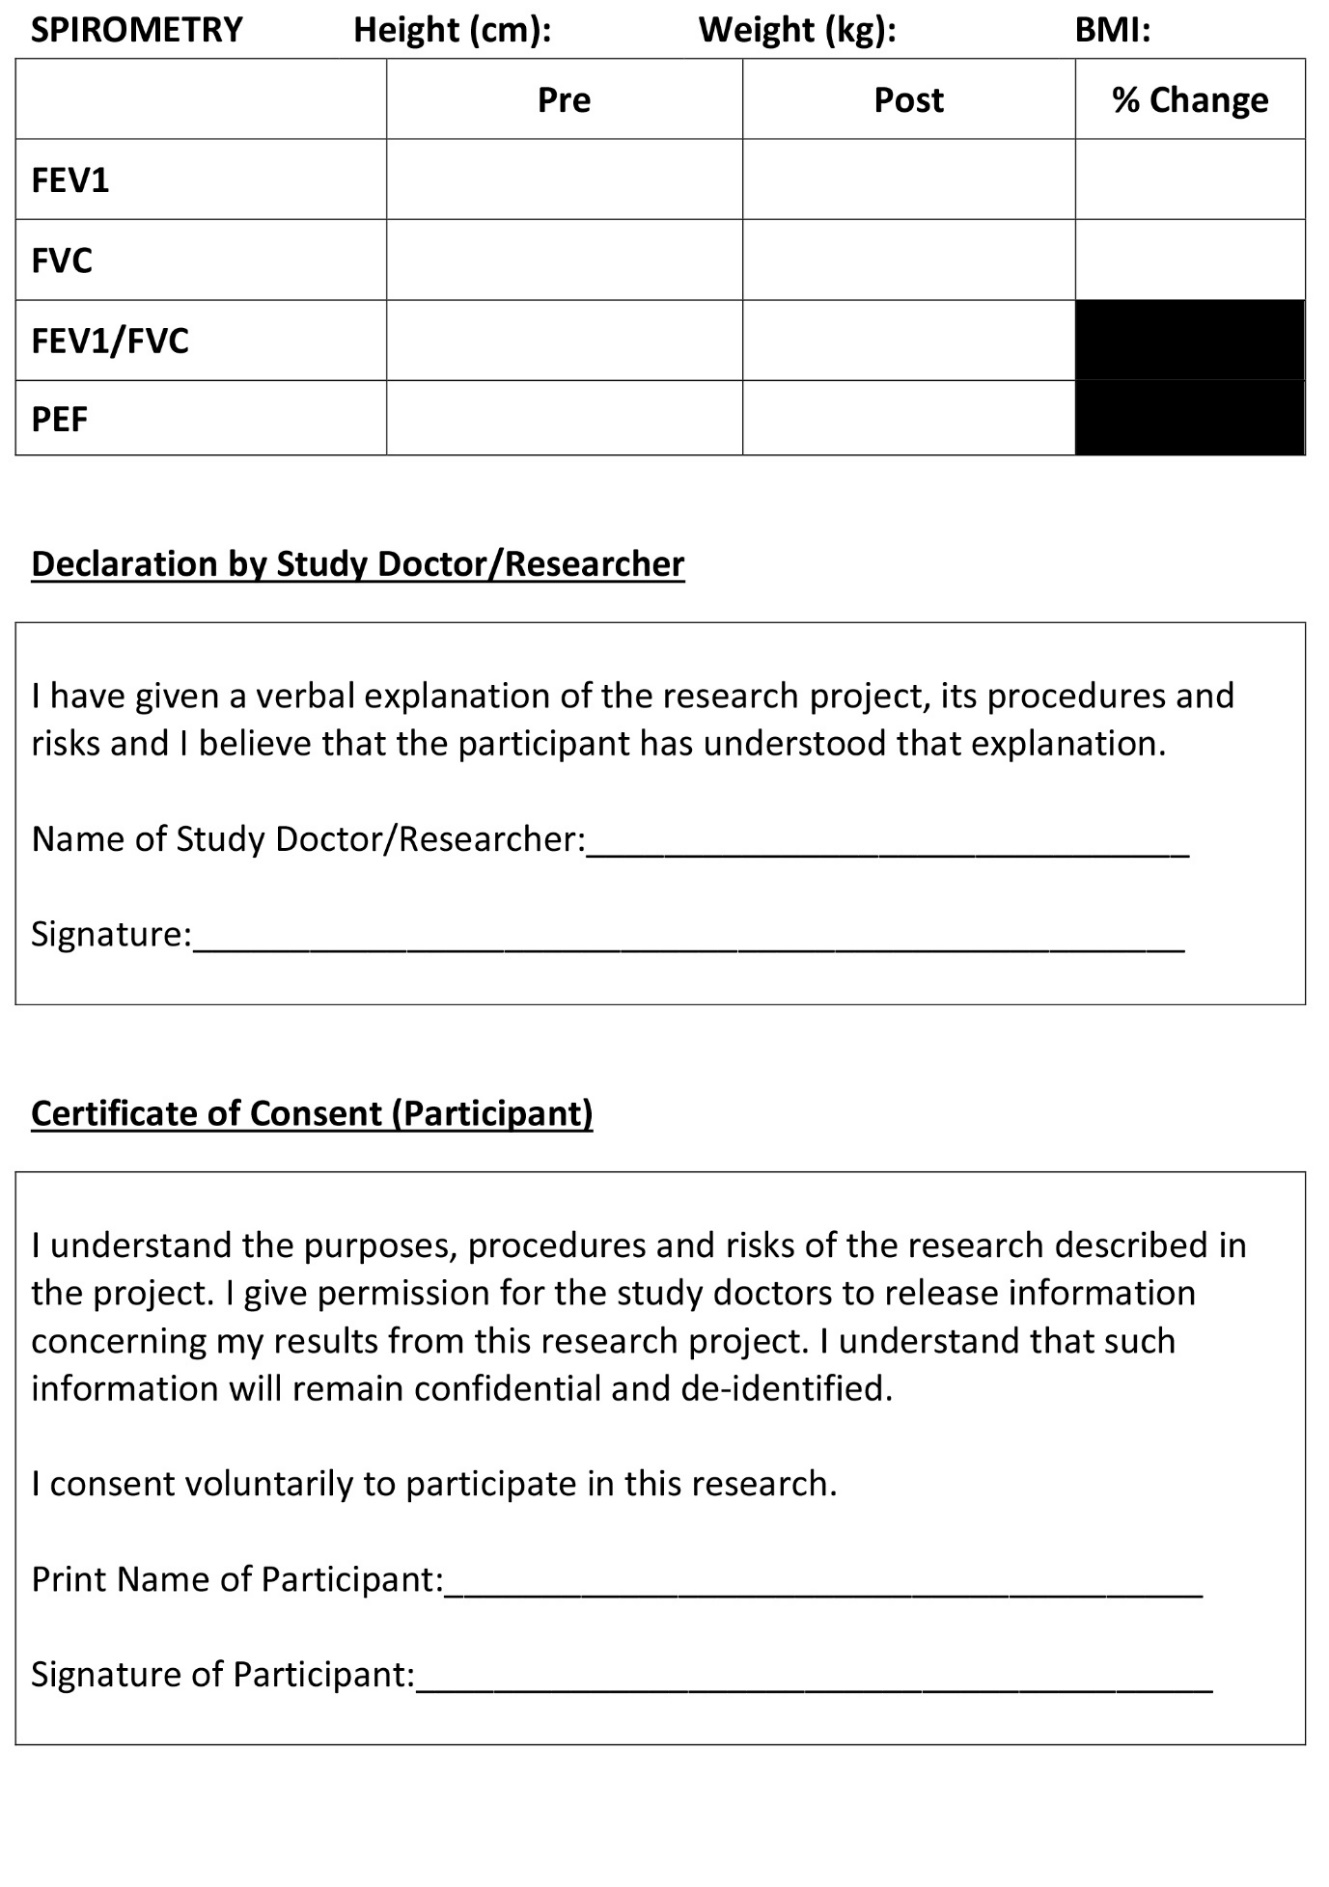

Supplement: Supplementary file 1 [file get_supplementary_file.php]
